# Supplementary material for: In Vitro Efficacy of Isobutyl Cyanoacrylate Nanoparticles against Fish Bacterial Pathogens and Selection Preference by Rainbow Trout (Oncorhynchus mykiss)
Source: MDPI journal article supplement (doi:10.3390/microorganisms11122877), 2023-11-28
Supplement: s1 [file s1]

NP30 E.tarda (typical)

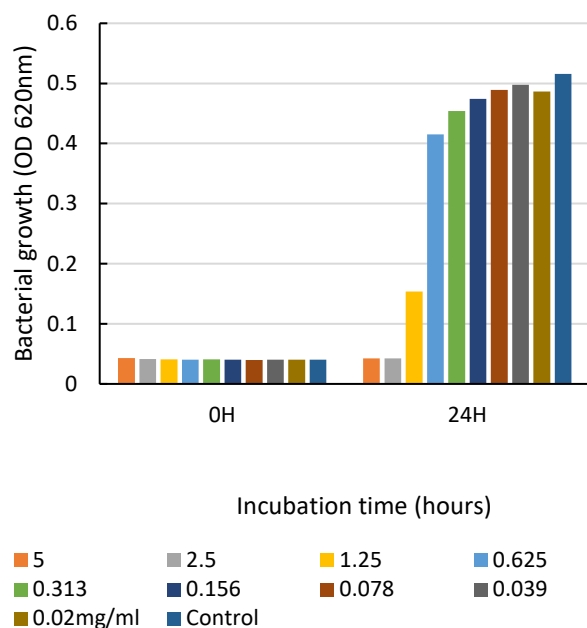

E.tarda (typical) NP30 Surfactant

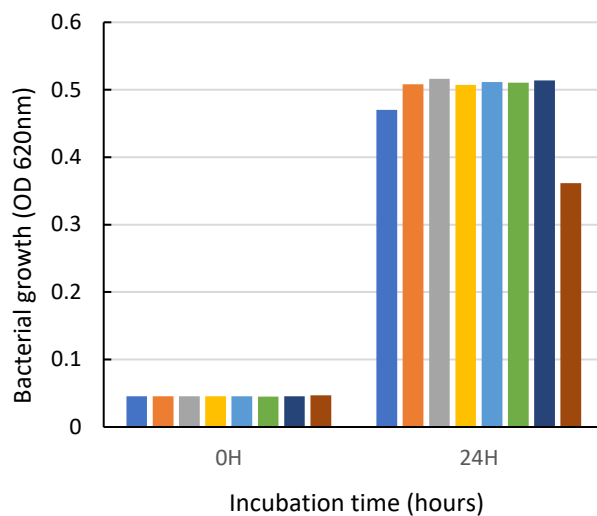

D60 E. tarda (typical)

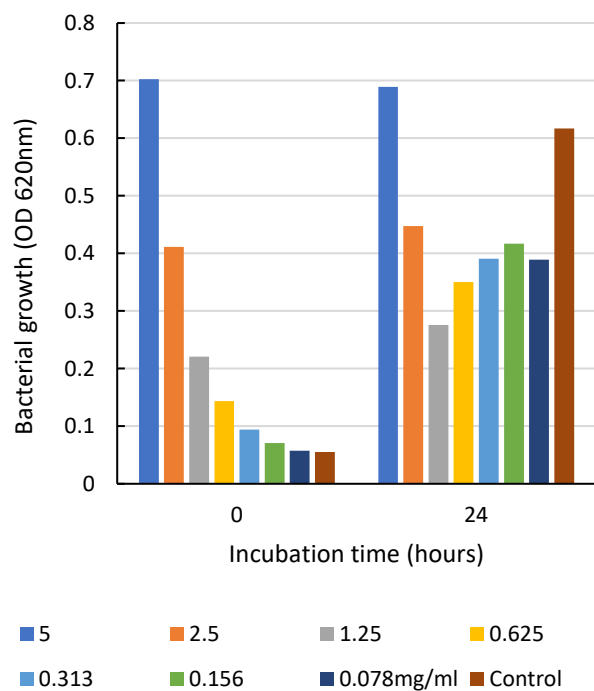

E. tarda (typical) D60 Surfactant

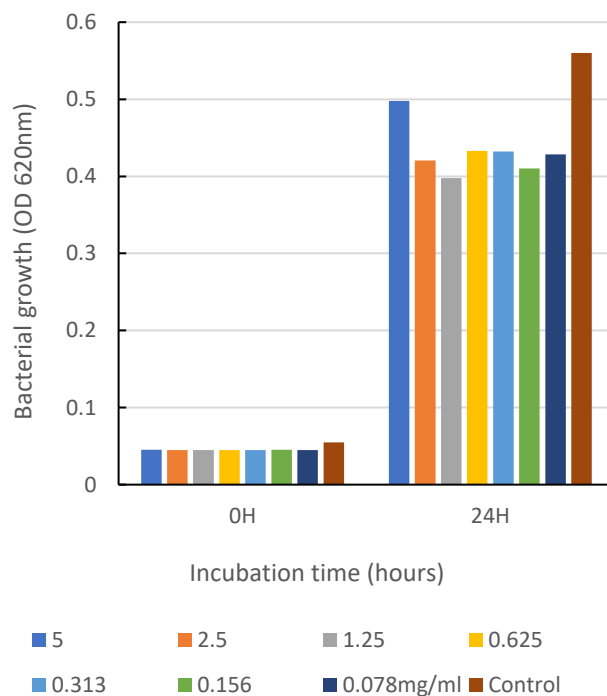

NP30 *E. tarda* (atypical)

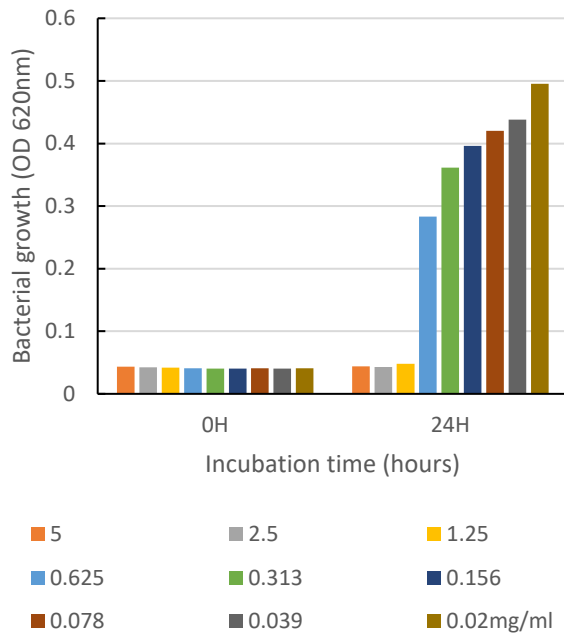

*E. tarda* (atypical) NP30 Surfactant

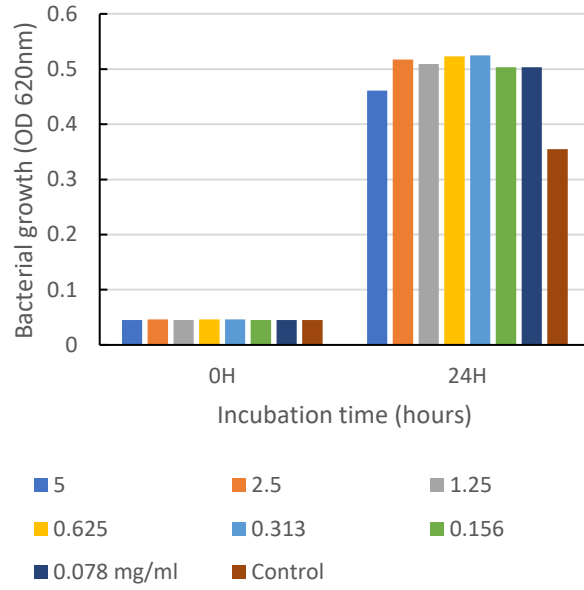

D60 *E. tarda* (atypical)

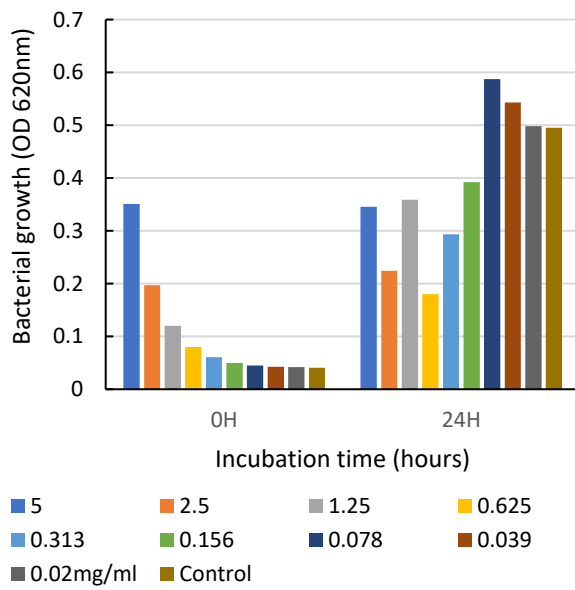

*E. tarda* (atypical) D60 Surfactant

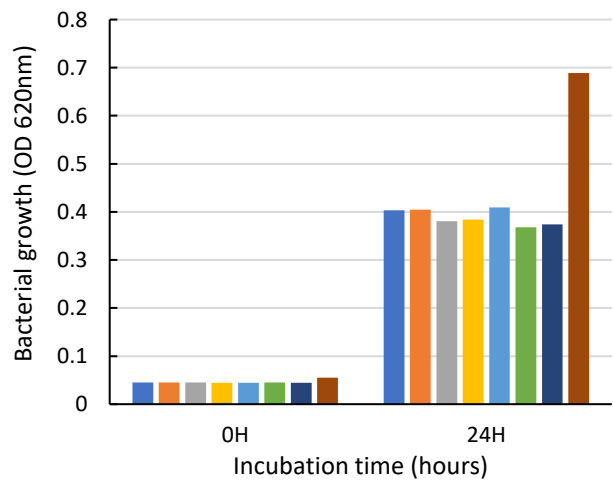

**Nocardia seriolae NP30**

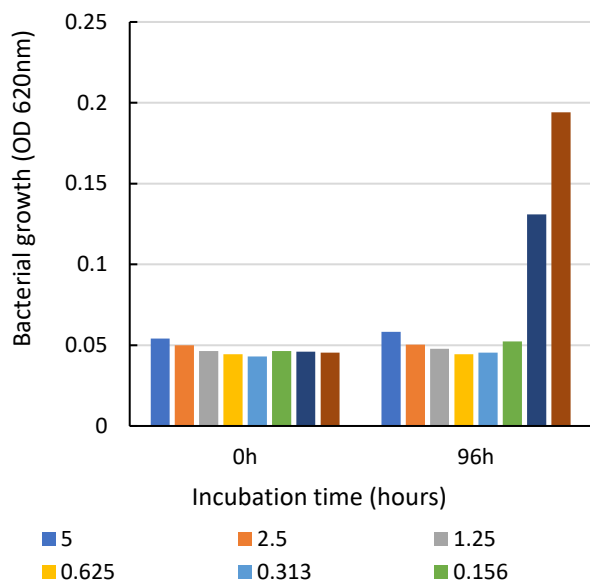

**Nocardia seriolae NP30 Surfactant**

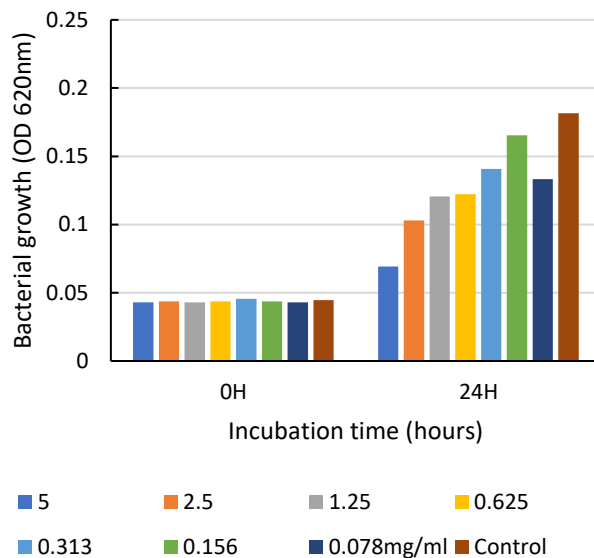

**Nocardia seriolae D60**

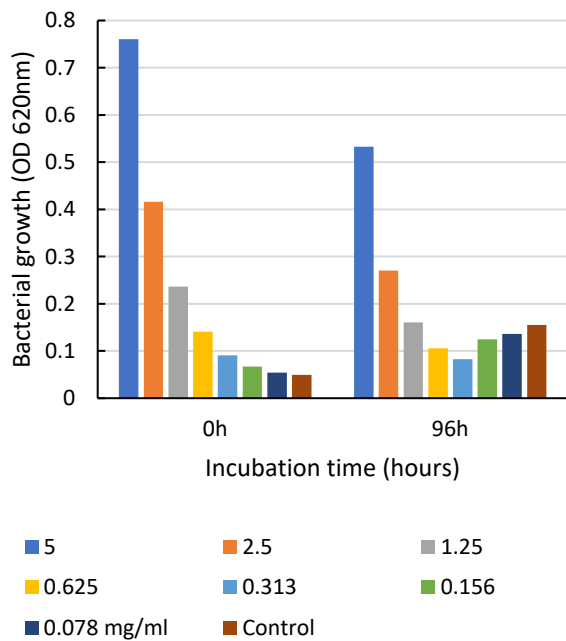

**Nocardia seriolae D60 Surfactant**

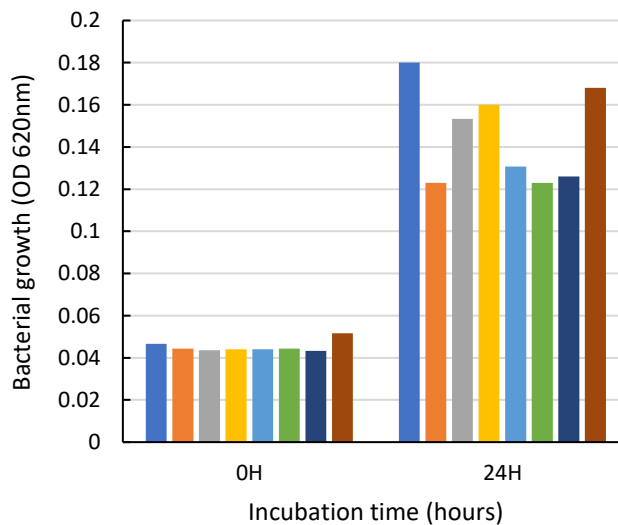

**P. damsela NP30**

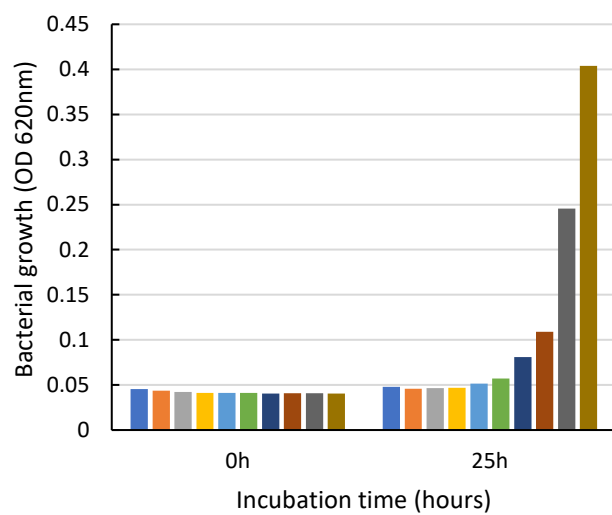

**P. damsela NP30 Surfactant**

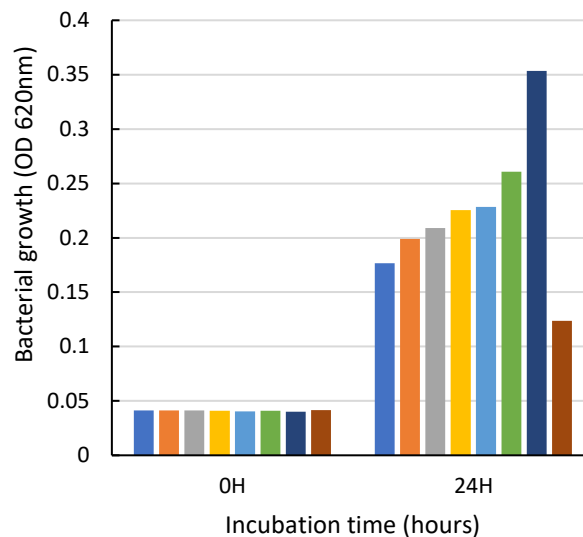

**P. damsela D60**

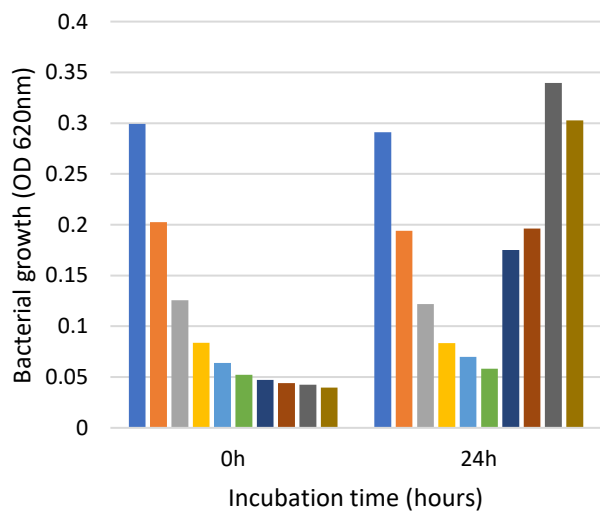

**P. damsela D60 Surfactant**

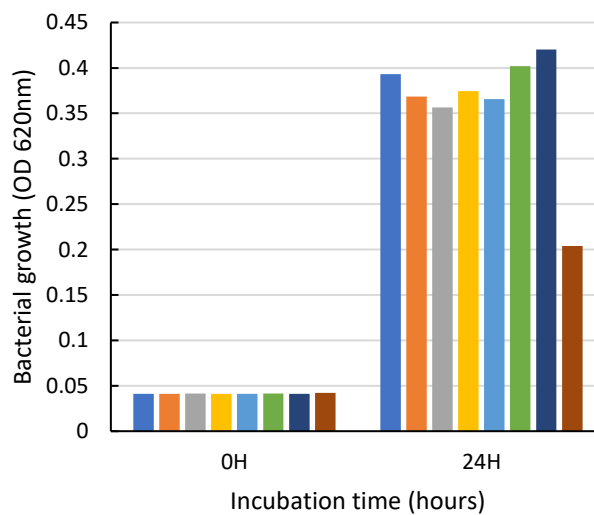

**L. garviae NP30**

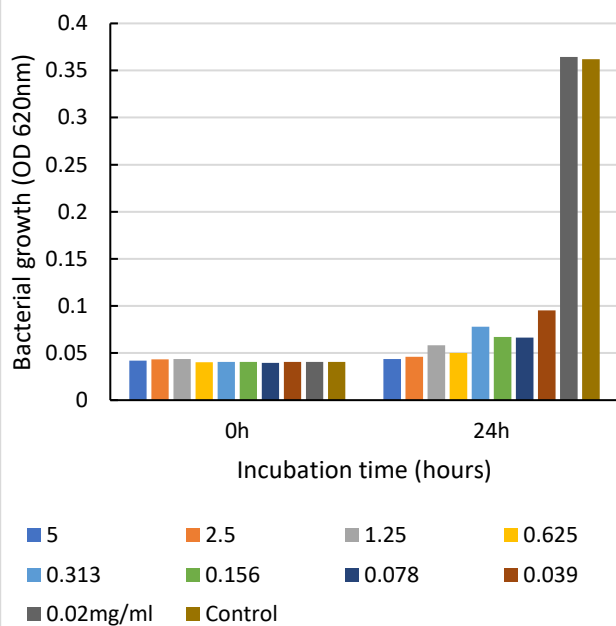

**L. garviae NP30 Surfactant**

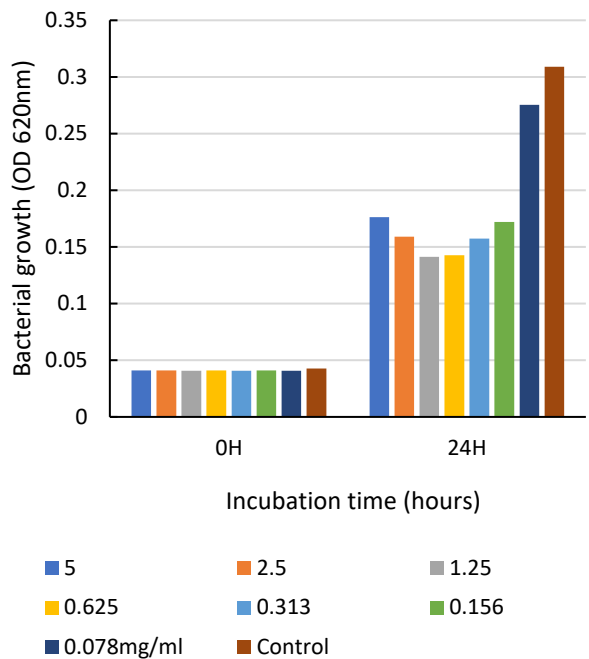

**L. garvieae D60**

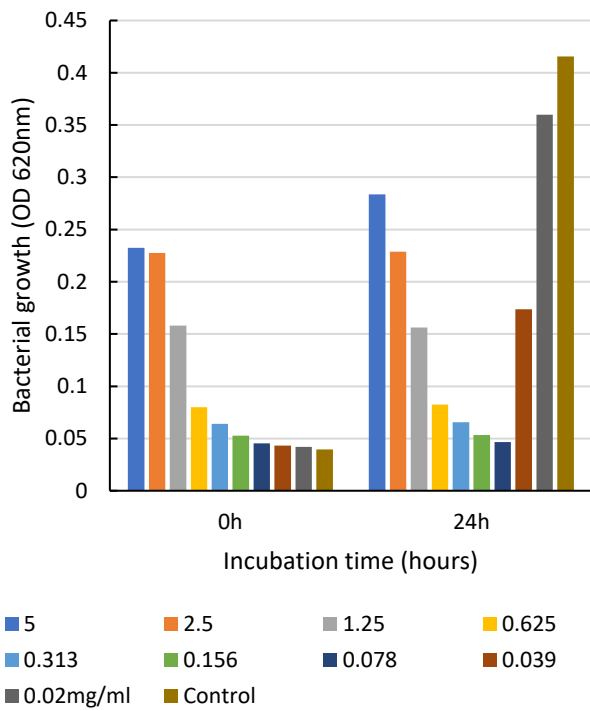

**L. garviae D60 Surfactant**

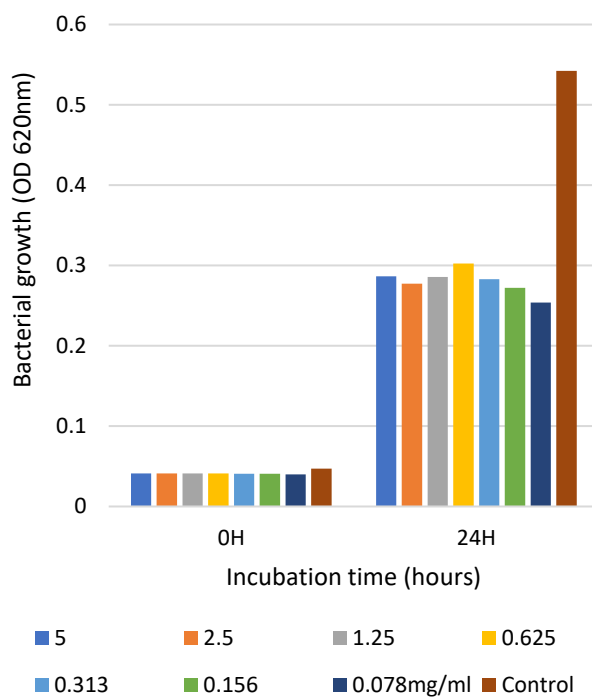

**S. iniae NP30**

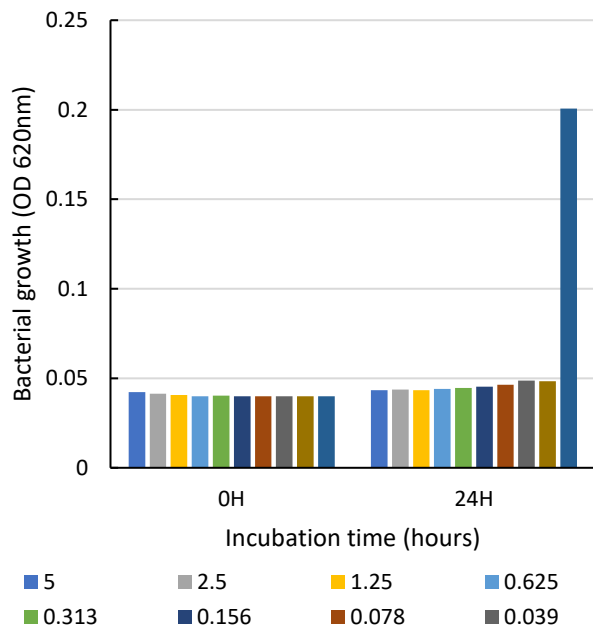

**S. iniae NP30 Surfactant**

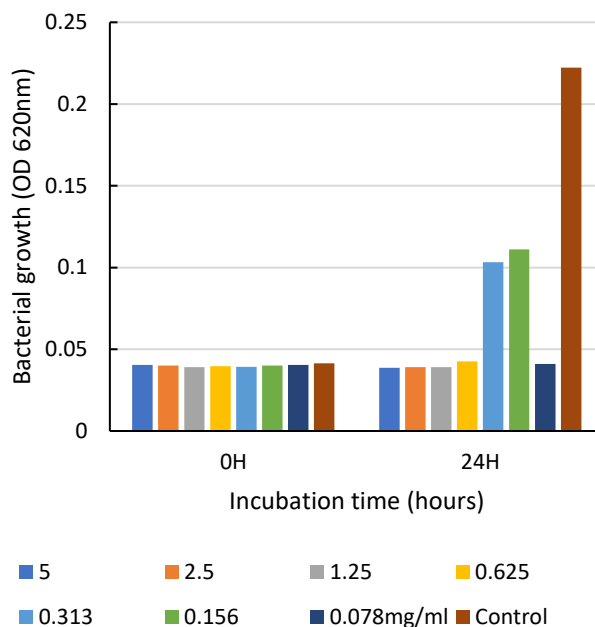

**S. iniae D60**

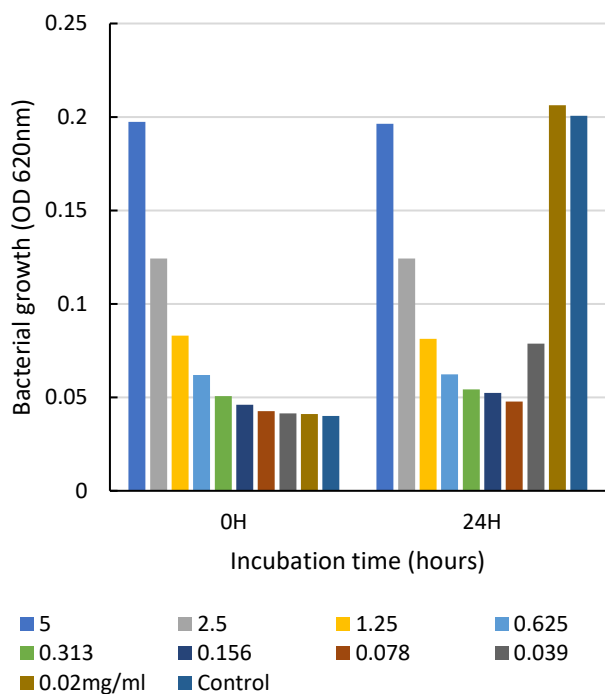

**S. iniae D60 Surfactant**

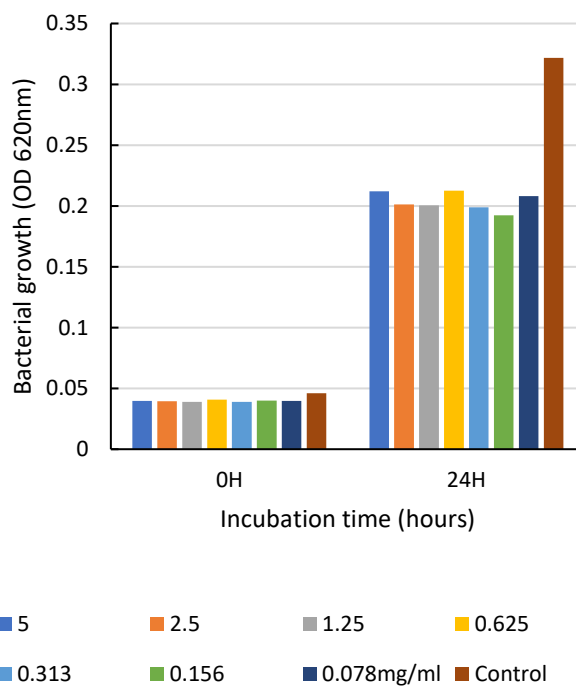

**T. maritimum NP30**

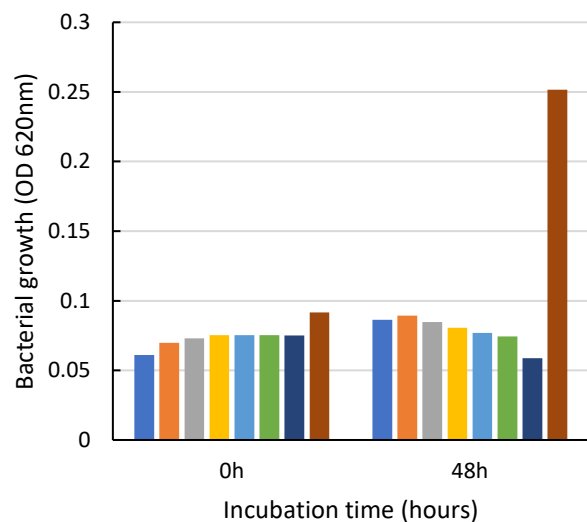

**T. maritimum NP30 Surfactant**

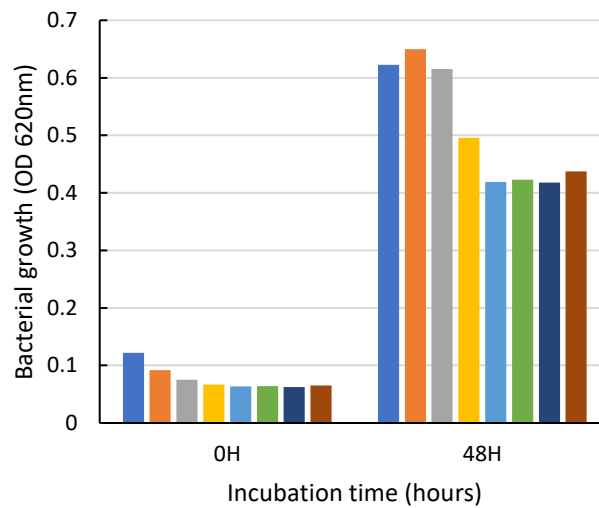

**T. maritimum D60**

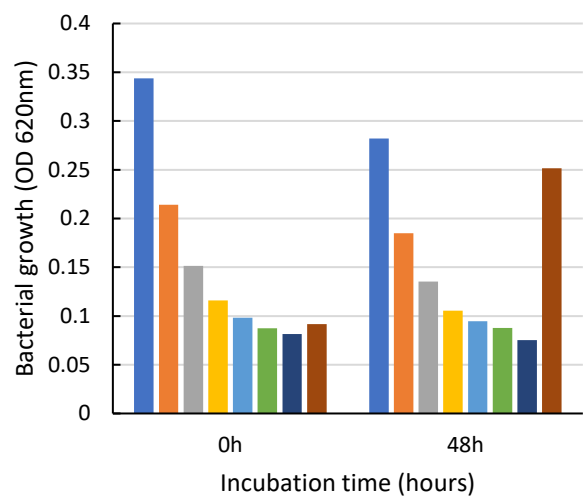

**T. maritimum D60 Surfactant**

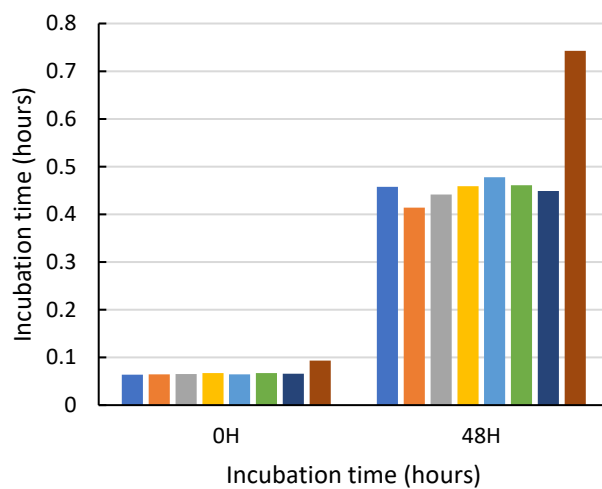

**V. rotiferanus NP30**

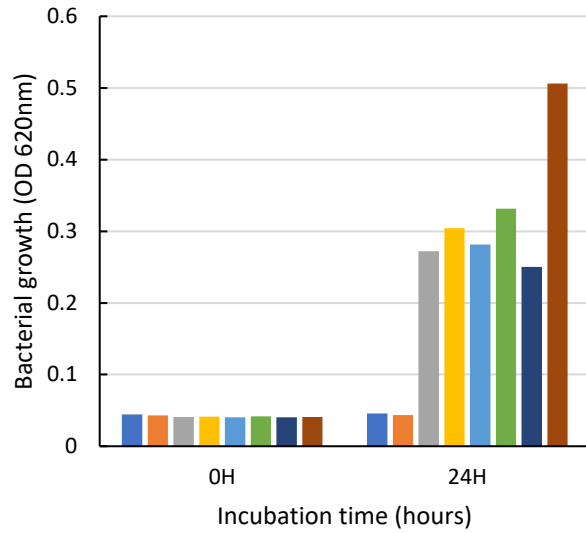

**V. rotiferanus NP30 Surfactant**

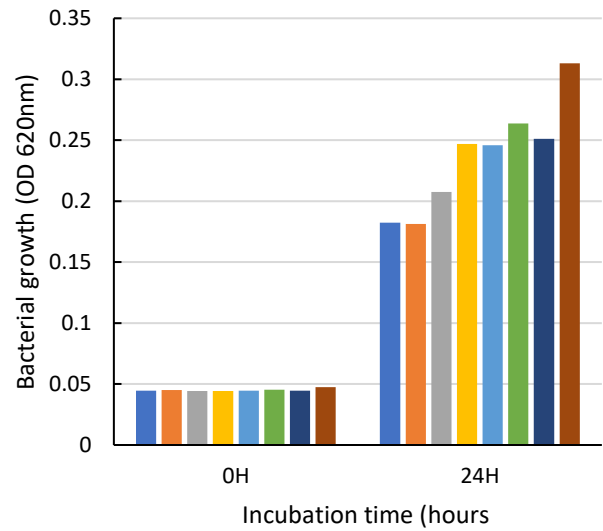

**V. rotiferanus D60**

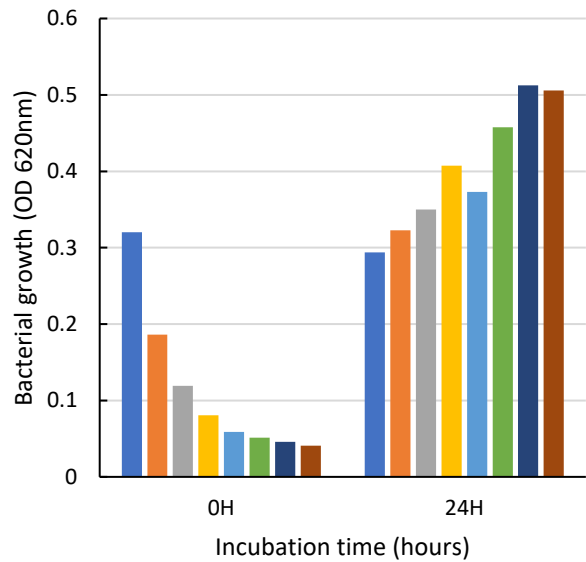

**V. rotiferanus D60 Surfactant**

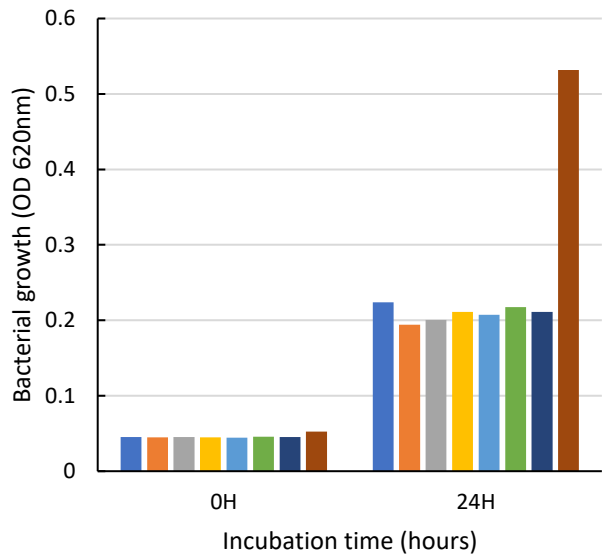



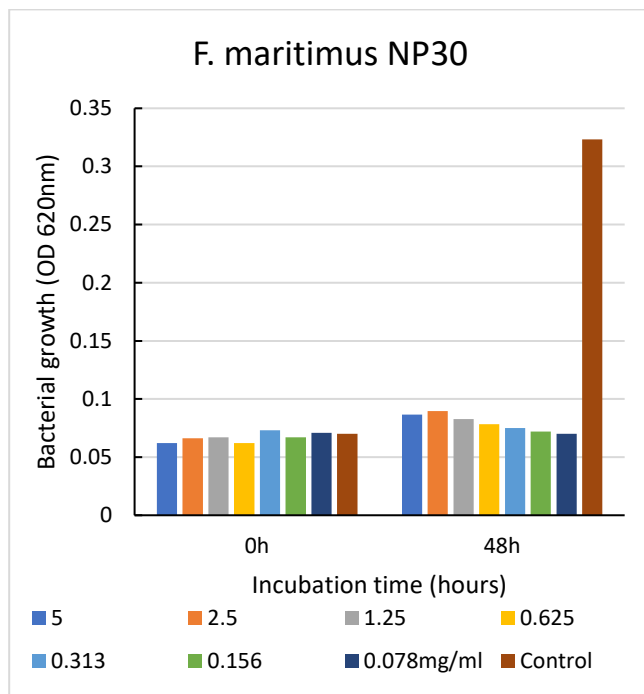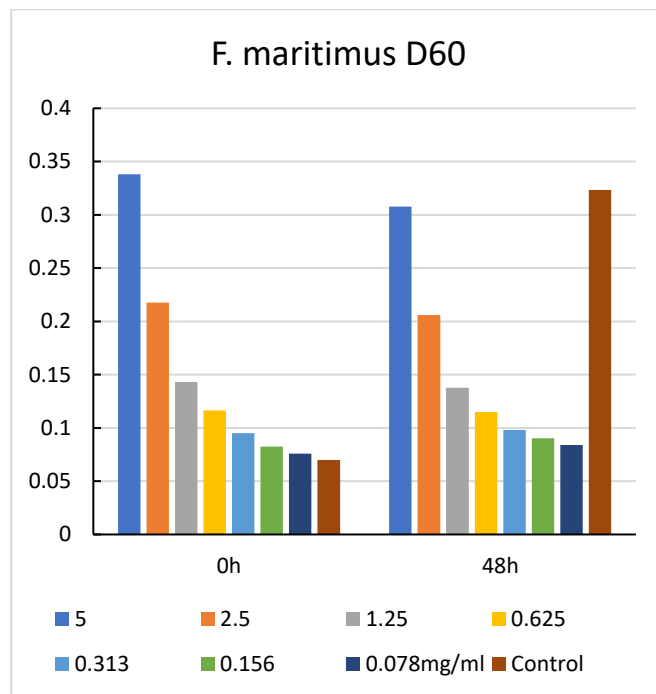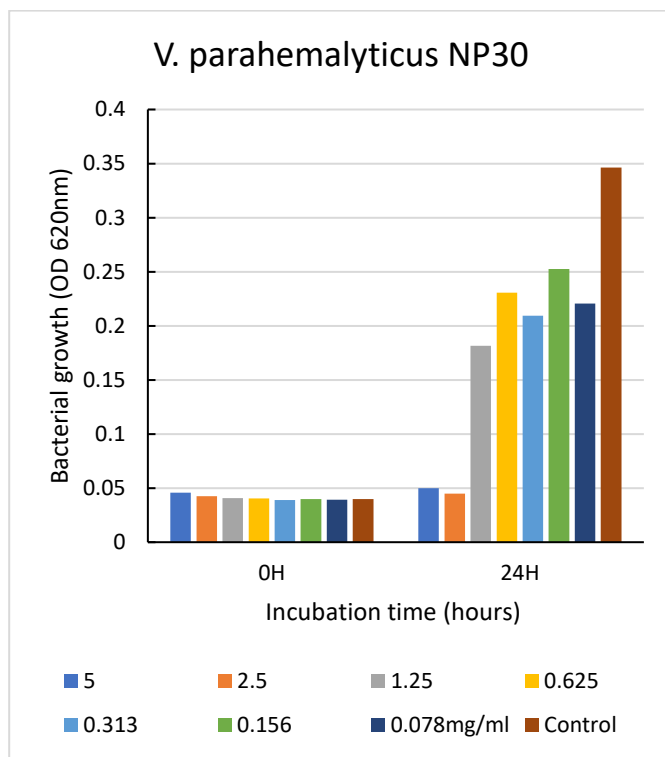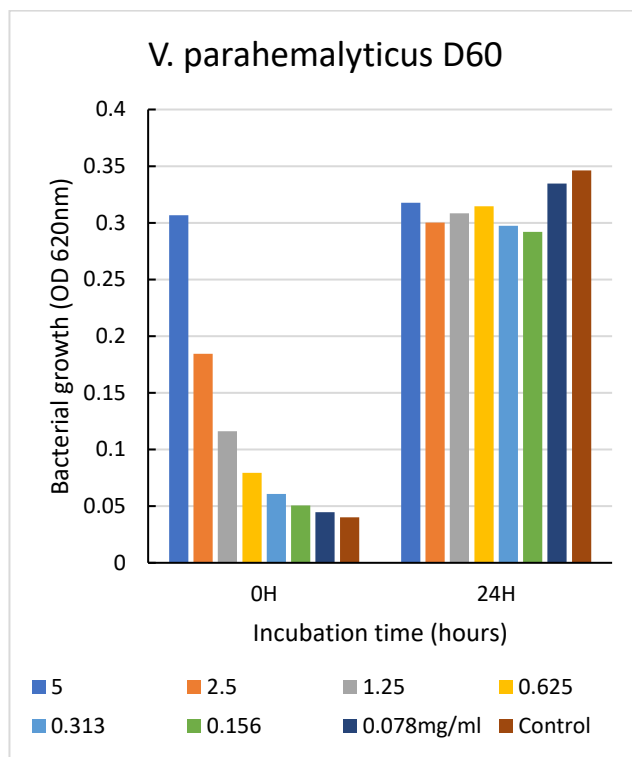

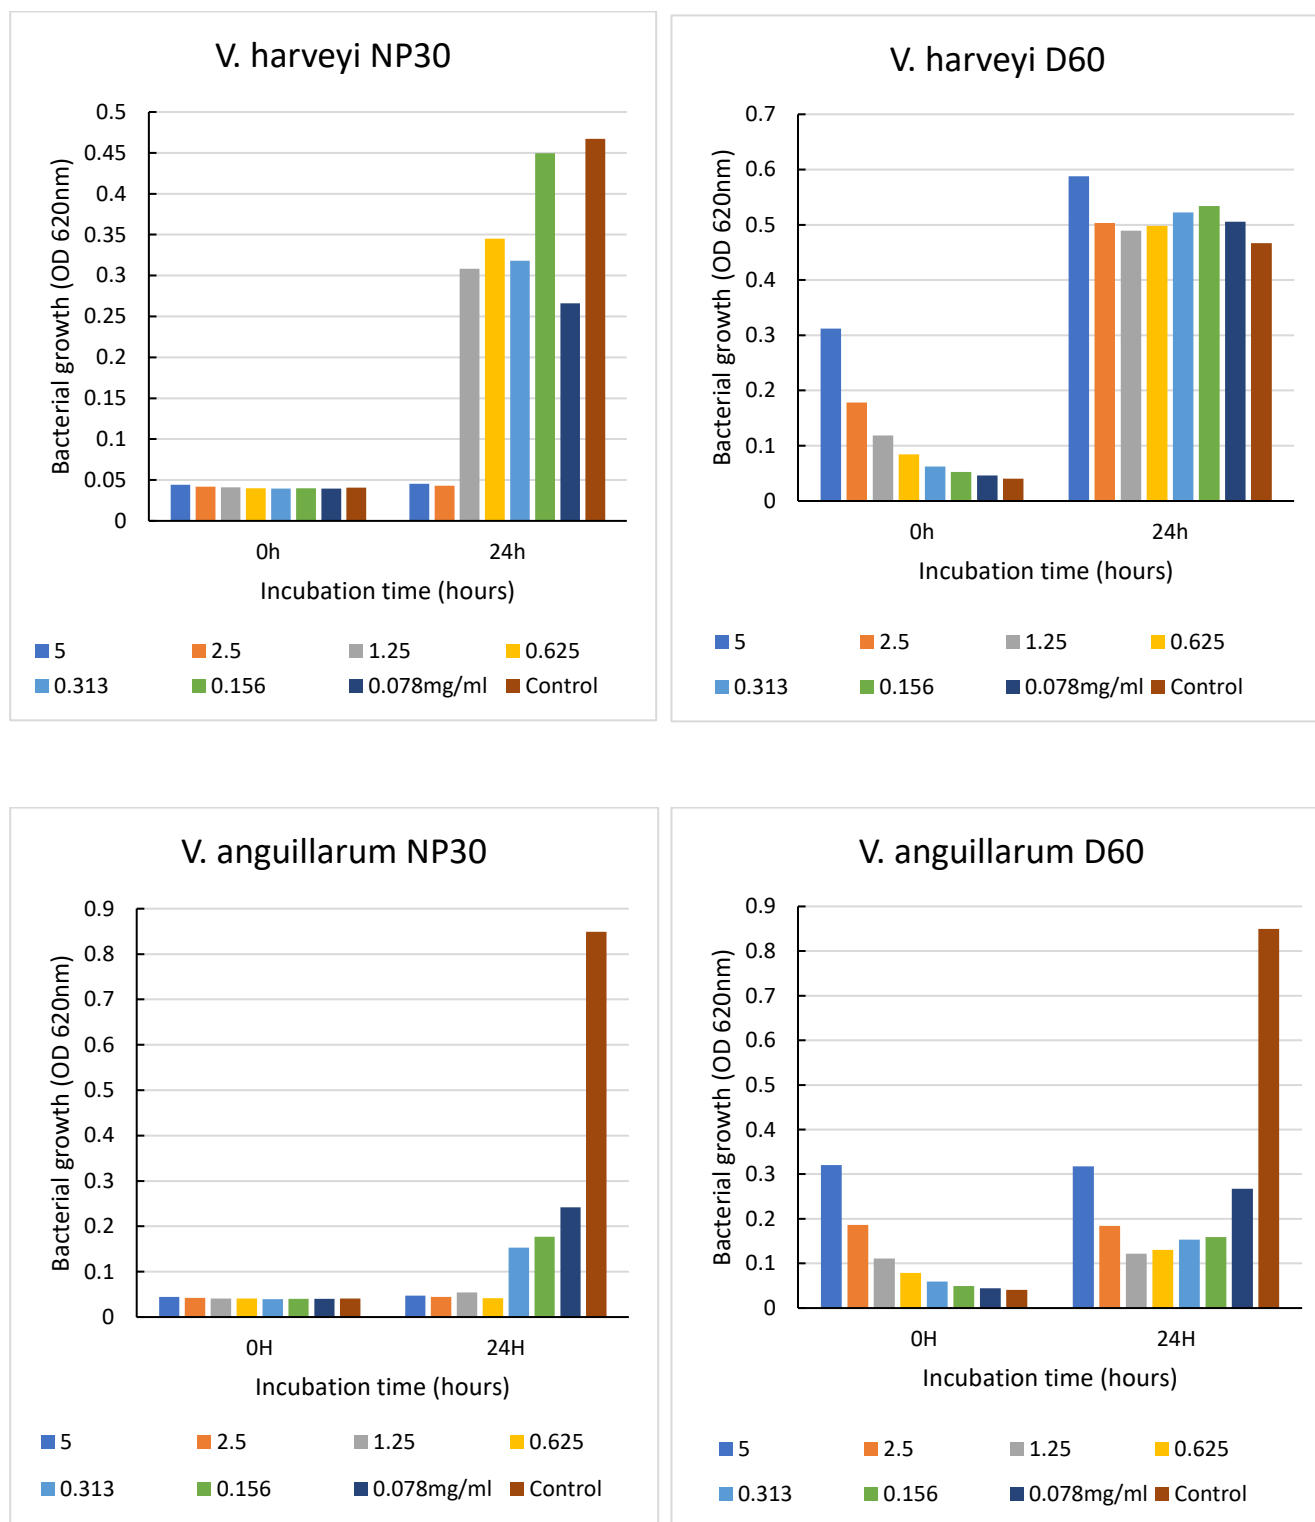

**Figure S1:** Bacteria growth before (0H) and after incubation (24H/48H or 96H) of MIC assays for each bacteria strain using the isobutyl-cyanoacrylate nanoparticles (D60 & NP30) and their respective dispersants.

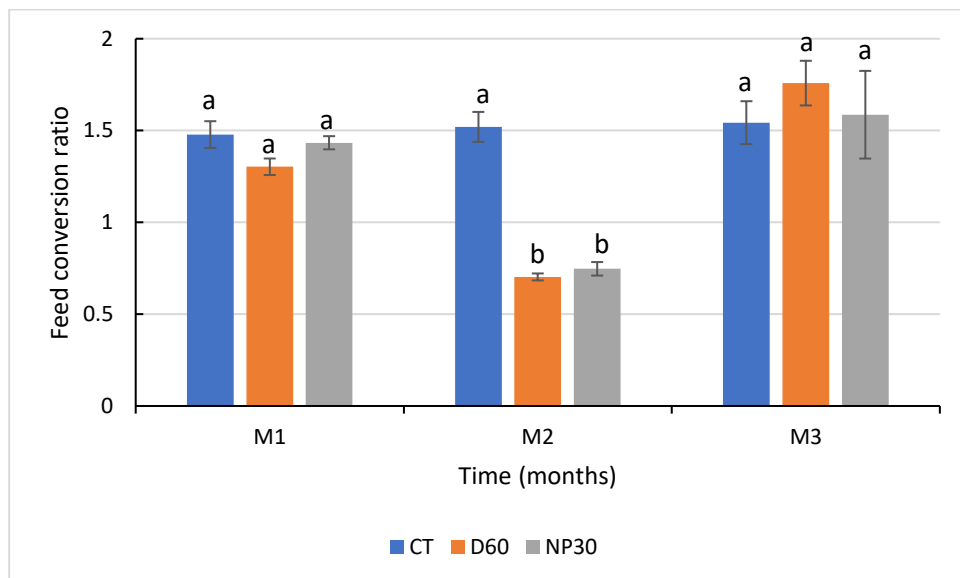

Figure S2: Monthly feed conversion ratio per treatment where different letter superscripts, *a*, and *b*, indicate significant differences between treatments and or sampling time ( $P < 0.05$ ). CT = Control group; M1, M2 & M3 = Months 1,2 & 3. All data were expressed as means  $\pm$  SEM,  $n = 2$ .
